# Supplementary material for: Interplay between Genome, Metabolome and Microbiome in Colorectal Cancer
Source: MDPI journal article supplement (doi:10.3390/cancers13246216), 2021-12-10
Supplement: s1 [file s1]

# Interplay between genome, metabolome and microbiome in colorectal cancer

Koldo Garcia-Etxebarria, Marc Clos-Garcia, Oiana Telleria, Beatriz Nafria, Cristina Alonso, Marta Iruarizaga-Lejarreta, Andre Franke, Anais Crespo, Agueda Iglesias, Joaquín Cubiella, Luis Bujanda and Juan Manuel Falcón-Pérez

| <b>Supplementary material</b> | <b>Page</b> |
|-------------------------------|-------------|
| Supplementary Table S1        | 2           |

**Supplementary Table S1:** Association study results of SNP previously reported to be associated with colorectal cancer. AD vs C, adenoma vs healthy controls; CRC vs C, colorectal cancer vs healthy controls; CRC vs AD, colorectal cancer vs adenoma; CRC+AD vs C, adenomas and colorectal cancer vs controls. OR, odds-ratio; CI 95%, 95 % of confidence interval of odds-ratio.

| SNP        | AD vs C      |               | CRC vs C     |               | CRC vs AD   |               | CRC+AD vs C  |               |
|------------|--------------|---------------|--------------|---------------|-------------|---------------|--------------|---------------|
|            | P            | OR (CI 95%)   | P            | OR (CI 95%)   | P           | OR (CI 95%)   | P            | OR (CI 95%)   |
| rs4500715  | 0.655        | 1.3 (0.4-4.5) | 0.358        | 0.4 (0.1-2.5) | 0.13        | 0.4 (0.1-1.4) | 0.65         | 0.8 (0.2-2.4) |
| rs61776719 | 0.968        | 1.0 (0.4-2.6) | 0.095        | 2.2 (0.9-5.6) | 0.189       | 1.6 (0.8-3.4) | 0.402        | 1.4 (0.7-2.9) |
| rs12143541 | 0.282        | 0.5 (0.1-1.7) | 0.954        | 1.0 (0.3-3.2) | 0.265       | 1.9 (0.6-6.1) | 0.389        | 0.6 (0.2-1.8) |
| rs11893063 | 0.79         | 0.9 (0.4-1.9) | 0.583        | 1.2 (0.6-2.6) | 0.98        | 1.0 (0.5-2.1) | 0.927        | 1.0 (0.5-1.9) |
| rs7593422  | 0.12         | 1.7 (0.9-3.5) | 0.437        | 1.4 (0.6-3.1) | 0.646       | 0.9 (0.4-1.7) | 0.143        | 1.6 (0.9-3.0) |
| rs9831861  | 0.376        | 0.7 (0.3-1.6) | 0.09         | 0.5 (0.2-1.1) | 0.649       | 0.8 (0.4-1.8) | 0.131        | 0.6 (0.3-1.2) |
| rs12635946 | 0.397        | 0.7 (0.3-1.7) | 0.162        | 1.9 (0.8-5.0) | 0.618       | 1.2 (0.6-2.7) | 0.271        | 1.5 (0.7-3.1) |
| rs17035289 | 0.231        | 0.5 (0.2-1.5) | <b>0.017</b> | 0.2 (0.1-0.8) | 0.284       | 0.6 (0.2-1.6) | 0.086        | 0.4 (0.2-1.1) |
| rs75686861 | 0.104        | 2.8 (0.8-9.6) | 0.594        | 1.5 (0.3-7.4) | 0.338       | 0.6 (0.2-1.8) | 0.115        | 2.5 (0.8-8.0) |
| rs3131043  | 0.695        | 1.2 (0.5-2.6) | 0.297        | 1.6 (0.7-3.6) | 0.364       | 1.4 (0.7-3.1) | 0.454        | 1.3 (0.7-2.5) |
| rs9271770  | 0.859        | 1.1 (0.4-3.1) | 0.86         | 0.9 (0.3-2.8) | 0.729       | 0.8 (0.3-2.5) | 0.747        | 0.9 (0.4-2.1) |
| rs3801081  | 0.988        | 1.0 (0.4-2.3) | 0.993        | 1.0 (0.4-2.4) | 0.587       | 0.8 (0.3-1.9) | 0.943        | 1.0 (0.5-2.0) |
| rs1412834  | 0.426        | 0.7 (0.3-1.6) | 0.193        | 0.6 (0.3-1.3) | 0.793       | 0.9 (0.4-2.0) | 0.137        | 0.6 (0.3-1.2) |
| rs12427600 | 0.61         | 1.3 (0.5-3.1) | 0.872        | 1.1 (0.4-2.8) | 0.368       | 0.7 (0.3-1.6) | 0.805        | 1.1 (0.5-2.4) |
| rs7993934  | 0.094        | 0.4 (0.2-1.1) | 0.626        | 1.3 (0.5-3.2) | 0.177       | 1.8 (0.8-4.5) | 0.296        | 0.7 (0.3-1.4) |
| rs4776316  | 0.437        | 0.7 (0.3-1.7) | 0.847        | 0.9 (0.4-2.2) | 0.359       | 1.5 (0.6-3.6) | 0.481        | 0.8 (0.4-1.6) |
| rs7495132  | 0.818        | 1.2 (0.3-5.2) | 0.398        | 2.0 (0.4-9.2) | 0.737       | 1.2 (0.3-4.6) | 0.673        | 1.3 (0.4-4.9) |
| rs61336918 | 0.312        | 0.7 (0.3-1.4) | 0.177        | 0.6 (0.3-1.3) | 0.986       | 1.0 (0.4-2.3) | 0.133        | 0.6 (0.3-1.2) |
| rs285245   | 0.832        | 0.9 (0.2-3.7) | 0.374        | 1.7 (0.5-5.5) | 0.296       | 1.8 (0.6-5.8) | 0.662        | 1.3 (0.4-3.7) |
| rs12979278 | 0.972        | 1.0 (0.4-2.2) | 0.786        | 0.9 (0.4-1.9) | 0.742       | 1.1 (0.6-2.3) | 0.781        | 0.9 (0.5-1.8) |
| rs3787089  | 0.665        | 1.2 (0.5-3.1) | <b>0.022</b> | 3.1 (1.2-8.1) | <b>0.01</b> | 2.8 (1.3-6.1) | 0.1          | 1.9 (0.9-4.1) |
| rs6983267  | 0.594        | 1.2 (0.6-2.6) | 0.297        | 0.6 (0.3-1.5) | 0.08        | 0.5 (0.2-1.1) | 0.758        | 0.9 (0.5-1.8) |
| rs16892766 | 0.573        | 1.5 (0.4-6.1) | 0.508        | 0.6 (0.1-3.0) | 0.371       | 0.6 (0.2-1.9) | 0.872        | 1.1 (0.3-4.1) |
| rs10795668 | 0.117        | 2.0 (0.8-4.5) | 0.403        | 1.5 (0.6-3.8) | 0.461       | 0.8 (0.4-1.6) | 0.147        | 1.8 (0.8-3.8) |
| rs3802842  | 0.83         | 1.1 (0.4-3.1) | 0.811        | 0.9 (0.3-2.4) | 0.695       | 1.2 (0.5-2.9) | 0.619        | 1.2 (0.5-2.9) |
| rs4779584  | 0.559        | 1.4 (0.5-4.2) | 0.209        | 2.2 (0.6-7.3) | 0.631       | 1.3 (0.5-3.4) | 0.33         | 1.6 (0.6-4.3) |
| rs4444235  | 0.071        | 2.1 (0.9-4.7) | 0.73         | 1.2 (0.5-2.6) | 0.577       | 0.8 (0.4-1.7) | 0.147        | 1.7 (0.8-3.3) |
| rs9929218  | 0.974        | 1.0 (0.4-2.2) | 0.307        | 0.6 (0.3-1.5) | 0.256       | 0.6 (0.3-1.4) | 0.527        | 0.8 (0.4-1.6) |
| rs10411210 | 0.271        | 1.8 (0.6-4.9) | 0.758        | 0.8 (0.3-2.6) | 0.054       | 0.4 (0.1-1.0) | 0.582        | 1.3 (0.5-3.1) |
| rs961253   | 0.874        | 0.9 (0.4-2.0) | 0.548        | 1.3 (0.6-2.8) | 0.468       | 1.3 (0.6-2.9) | 0.96         | 1.0 (0.5-1.9) |
| rs1801133  | <b>0.015</b> | 0.3 (0.1-0.8) | <b>0.01</b>  | 0.4 (0.2-0.8) | 0.792       | 0.9 (0.4-1.9) | <b>0.003</b> | 0.4 (0.2-0.7) |
| rs1801282  | 0.109        | 0.3 (0.1-1.3) | 0.273        | 0.5 (0.1-1.9) | 0.426       | 1.9 (0.4-9.3) | 0.123        | 0.4 (0.1-1.3) |
| rs4073     | 0.102        | 2.2 (0.9-5.5) | 0.282        | 1.6 (0.7-3.9) | 0.903       | 1.0 (0.5-2.2) | 0.1          | 1.9 (0.9-4.0) |
| rs1800795  | 0.362        | 1.5 (0.6-3.8) | 0.123        | 2.1 (0.8-5.5) | 0.648       | 1.2 (0.5-2.6) | 0.153        | 1.8 (0.8-3.8) |
| rs9344     | 0.729        | 1.1 (0.6-2.3) | 0.277        | 1.5 (0.7-3.4) | 0.089       | 2.0 (0.9-4.2) | 0.323        | 1.4 (0.7-2.6) |
| rs10067    | 0.617        | 0.7 (0.2-2.6) | 0.567        | 0.7 (0.2-2.4) | 0.965       | 1.0 (0.3-3.9) | 0.87         | 0.9 (0.3-2.6) |
| rs2102302  | 0.303        | 0.7 (0.3-1.4) | 0.794        | 0.9 (0.4-2.0) | 0.418       | 1.4 (0.7-2.8) | 0.535        | 0.8 (0.4-1.6) |
| rs12732    | 0.898        | 0.9 (0.3-2.5) | 0.455        | 1.5 (0.5-4.5) | 0.641       | 1.2 (0.5-3.0) | 0.688        | 1.2 (0.5-2.8) |
| rs4679392  | 0.33         | 1.5 (0.7-3.2) | 0.441        | 0.7 (0.3-1.6) | 0.062       | 0.5 (0.2-1.0) | 0.906        | 1.0 (0.5-1.8) |
| rs6826961  | 0.136        | 2.3 (0.8-6.5) | 0.169        | 2.1 (0.7-5.9) | 0.767       | 1.1 (0.5-2.7) | 0.162        | 1.9 (0.8-4.4) |
| rs6580076  | 0.368        | 1.6 (0.6-4.6) | 0.475        | 0.6 (0.2-2.2) | 0.094       | 0.4 (0.1-1.2) | 0.865        | 1.1 (0.4-2.7) |
| rs2277937  | <b>0.037</b> | 0.3 (0.1-0.9) | 0.14         | 0.5 (0.2-1.2) | 0.188       | 1.9 (0.7-4.9) | 0.062        | 0.5 (0.2-1.0) |
| rs1634730  | 0.547        | 1.4 (0.5-3.6) | 0.98         | 1.0 (0.3-3.2) | 0.448       | 0.7 (0.2-1.8) | 0.928        | 1.0 (0.4-2.5) |
| rs11766125 | 0.932        | 1.0 (0.4-2.1) | 0.463        | 0.7 (0.3-1.9) | 0.706       | 0.8 (0.4-2.0) | 0.525        | 0.8 (0.4-1.7) |
| rs15783    | 0.875        | 0.9 (0.4-2.0) | 0.423        | 1.4 (0.6-3.2) | 0.399       | 1.4 (0.7-2.8) | 0.706        | 1.1 (0.6-2.2) |
| rs11029621 | 0.516        | 1.3 (0.6-2.7) | 0.232        | 1.7 (0.7-3.8) | 0.542       | 1.3 (0.6-2.7) | 0.268        | 1.5 (0.8-2.8) |
| rs2933353  | 0.764        | 0.9 (0.4-2.1) | 0.426        | 0.7 (0.3-1.6) | 0.892       | 0.9 (0.4-2.1) | 0.745        | 0.9 (0.4-1.9) |
| rs2230283  | 0.772        | 1.1 (0.5-2.3) | 0.479        | 1.3 (0.6-2.9) | 0.817       | 1.1 (0.5-2.1) | 0.681        | 1.1 (0.6-2.1) |
| rs17647532 | 0.991        | 1.0 (0.4-2.4) | 0.485        | 0.7 (0.2-2.0) | 0.23        | 0.6 (0.2-1.4) | 0.547        | 0.8 (0.3-1.7) |
| rs1862458  | 0.136        | 0.5 (0.2-1.2) | 0.63         | 0.8 (0.3-2.0) | 0.157       | 1.9 (0.8-4.4) | 0.224        | 0.6 (0.3-1.3) |
| rs10752881 | 0.383        | 1.9 (0.4-8.4) | 0.257        | 2.2 (0.6-8.8) | 0.295       | 1.4 (0.7-2.9) | 0.301        | 1.9 (0.6-6.1) |
